# Supplementary material
Source: PubMed Central journal article supplement (PMC6644409)
Supplement: ao7b00891_si_001.pdf [file ao7b00891_si_001.pdf]

# Selective Adsorption of Coronene atop Polycyclic Aromatic

## Diimide Monolayer Investigated by STM and DFT

Yanfang Geng,<sup>†a</sup> Shuai Wang,<sup>†a</sup> Mengqi Shen,<sup>a</sup> Ranran Wang,<sup>b</sup> Xiao Yang,<sup>b</sup> Bin Tu,<sup>\*a</sup>

Dahui Zhao,<sup>\*b</sup> Qingdao Zeng<sup>\*a</sup>

<sup>a</sup> CAS Key Laboratory of Standardization and Measurement for Nanotechnology, CAS Center for Excellence in Nanoscience, National Center for Nanoscience and Technology (NCNST), 11 ZhongguancunBeiyitiao, Beijing 100190, P. R. China

<sup>b</sup> Beijing National Laboratory for Molecular Sciences, the Key Laboratory of Polymer Chemistry and Physics of the Ministry of Education, College of Chemistry, Peking University, Beijing 100871, China.

<sup>†</sup> These authors equally contributed to this work.

E-mail: [tub@nanoctr.cn](mailto:tub@nanoctr.cn); [dhzhao@pku.edu.cn](mailto:dhzhao@pku.edu.cn); [zengqd@nanoctr.cn](mailto:zengqd@nanoctr.cn)

**Table S1.** Experimental (Exp.) and calculated (Cal.) unit-cell parameters of PAI1, PAI1+Cor, PAI2, PAI6 and PAI8 arrays.

|                       |      | PAI1          | PAI1+Cor      | PAI2          | PAI6          | PAI8          |
|-----------------------|------|---------------|---------------|---------------|---------------|---------------|
| $a$ (nm)              | Exp. | $2.7 \pm 0.1$ | $2.9 \pm 0.1$ | $2.8 \pm 0.1$ | $2.7 \pm 0.1$ | $2.8 \pm 0.1$ |
|                       | Cal. | 2.78          | 2.90          | 2.62          | 2.94          | 2.96          |
| $b$ (nm)              | Exp. | $1.1 \pm 0.1$ | $1.3 \pm 0.1$ | $1.1 \pm 0.1$ | $1.0 \pm 0.1$ | $1.0 \pm 0.1$ |
|                       | Cal. | 1.16          | 1.28          | 1.20          | 1.06          | 1.22          |
| $\alpha$ ( $^\circ$ ) | Exp. | $92 \pm 2$    | $99 \pm 2$    | $82 \pm 2$    | $82 \pm 2$    | $88 \pm 2$    |
|                       | Cal. | 92            | 99            | 82            | 82            | 88            |

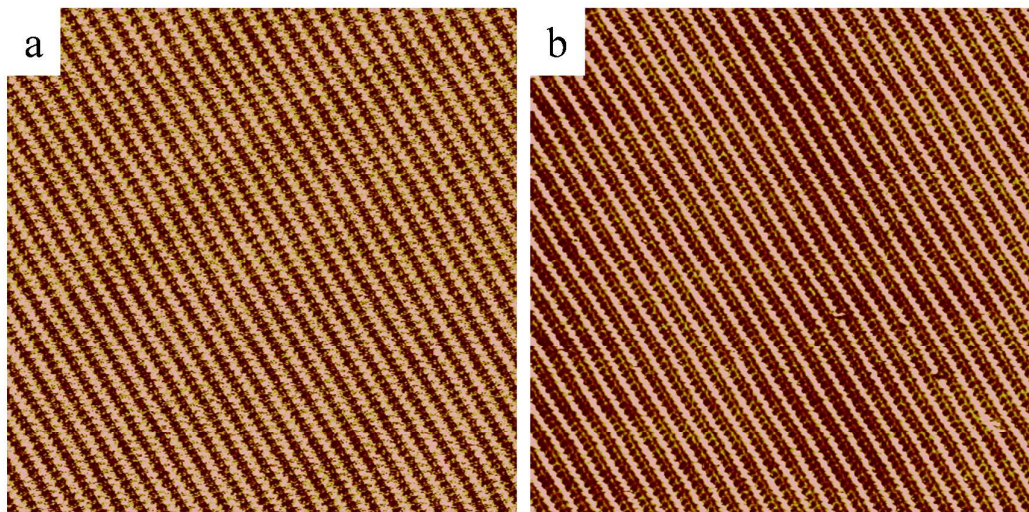

**Figure S1.** Large-scale STM images (70 nm  $\times$  70 nm) of PA11 self-assembled structures (a) and that incorporating coronene in PA11 preassembled structure (b). Tunneling condition: (a)  $I_{\text{set}} = 296.0$  pA,  $V_{\text{bias}} = 557.6$  mV; (b)  $I_{\text{set}} = 296.0$  pA,  $V_{\text{bias}} = 675.0$  mV.
